# Supplementary material
Source: PubMed Central journal article supplement (PMC3837948)
Supplement: JB.00911-13_zjb999092907so1.pdf [file JB.00911-13_zjb999092907so1.pdf]

1 Supplemental Information for:

2 **The Cell Division Protein FtsN: Identification of SPOR Domain Amino Acids Important**  
3 **for Septal Localization, Peptidoglycan-binding, and a Disulfide Bond**

4 Tammi R. Duncan,<sup>a\*‡</sup> Atsushi Yahashiri,<sup>a‡</sup> S.J. Ryan Arends,<sup>a†</sup>, David L. Popham,<sup>b</sup> and David S.  
5 Weiss<sup>a#</sup>

6

7 <sup>a</sup>Department of Microbiology, Carver College of Medicine, The University of Iowa, Iowa City,  
8 IA 52242, USA

9 <sup>b</sup>Department of Biological Sciences, Virginia Tech, Blacksburg, VA 24061, USA

10 \*Present Address: Biology Department, University of New Mexico, Albuquerque, NM 87131

11 † Present Address: Vertex Pharmaceuticals, Incorporated, 2500 Crosspark Rd, E200  
12 Coralville, IA 52241

13

14 ‡These authors contributed equally to this work.

15

16 #Corresponding author. Mailing address: Department of Microbiology, University of Iowa,  
17 Iowa City, IA 52242 USA. Phone: (319) 335-7785. Fax (319) 335-9006. E-mail: [david-  
18 weiss@uiowa.edu](mailto:david-weiss@uiowa.edu).

19 **Running title:** FtsN SPOR domain

20

## Supplemental Methods

21  
22  
23  
24  
25  
26  
27  
28  
29  
30  
31  
32  
33  
34  
35  
36  
37  
38  
39  
40  
41  
42

### Construction of plasmids

(i) *Plasmids for localization of mutant SPOR domains.* Most amino acid substitutions were constructed using degenerate primers and megaprimering (1). For example, pDSW1230 [P<sub>204</sub>::<sup>TT</sup>*gfp-ftsN*<sup>SPOR</sup> (R247A)] was constructed using P1325, which has a degenerate sequence at the codon for R247. First, P1325 (R247) and P761 were used with pBAD33-*ftsN* (2) as template to amplify a portion of the SPOR domain. The 243 bp product, which carried the desired substitution(s), was isolated using a PCR Cleanup Kit (Qiagen). Second, 10 µl of the 243 bp PCR product were used as a primer along with P760 in a subsequent PCR to produce full length *ftsN* encoding the substitution. The 957 bp product was purified and then used as a template for a third PCR reaction, wherein P1123 and P761 were used to amplify only the mutant SPOR domain. The resulting 270 bp product was cut with BamHI and HindIII, and ligated into the corresponding sites of pDSW962 (3). After transformation, multiple isolates were sequenced to obtain a set of plasmids that encoded <sup>TT</sup>*gfp* fusions to SPOR domains with multiple substitutions at codon 247. Similar procedures were used to construct additional mutants using the following degenerate primers: P1326(M249), P1327(Q251), P1328(S254,) P1329(N281), P1330(W283), P1331(R285), P1332(V287), P1333(P290), P1334(R256), P1335(E259), P1336(E262), P1337(T263), P1338(R265), P1339(Q267), P1340(F270), P1341(D274), P1342(K276), P1343(T278), P1344(N280), P1345(K292), P1346(K294), P1347(E295), P1348(N298), P1349(S299), P1350(N302), P1351(R303), P1352(K305), P1353(M306), P1477(R247), and P1497(Q251).

43 A few mutations were constructed similarly, but with primers that introduced a specific  
44 amino acid change (i.e., not degenerate): P1478 (R247K), P1479 (T263S), P1480 (T263D),  
45 P1498 (Q251K), P1581 (M249A), P1582 (V287A), P1583 (R256A) and P1584 (K294A).

46 Amino acid substitutions near the C-terminus of the SPOR domain were obtained by a  
47 simpler PCR procedure in which the entire SPOR domain was amplified using as 5' primer  
48 P1123 and as 3' primer one of the following primers with a degenerate codon: P1354 (T310),  
49 P1355 (N311), P1356 (I313), or P1357 (L315). The resulting 270 bp product was cut with  
50 BamHI and HindIII, and then ligated into the same sites of pDSW962 to create the desired *TT* *gfp*-  
51 *ftsN*<sup>SPOR</sup> fusion construct.

52 To disrupt the putative disulfide bond the C252A and C312A substitutions were  
53 introduced by PCR using pDSW992 (4) as template and the following primer pairs: P1790 +  
54 P761; P1791 + P1123; or P1790 + P1791. The resulting 270 bp products were cut with HindIII  
55 and BamHI, and then ligated into the same sites of pDSW962.

56 (ii) *Plasmids for overproduction of His<sub>6</sub>-tagged SPOR domains.* To overproduce His<sub>6</sub>-  
57 FtsN<sup>SPOR</sup> with a native C-terminus, primers P1123 and P761 were used to amplify the SPOR  
58 domain from template plasmid pDSW992. The resulting 269 bp fragment was cut with BamHI  
59 and HindIII, and then ligated into the same sites of pQE80L. This construct resulted in poor  
60 overproduction, a problem traced to lack of disulfide bond formation in the cytosol and FtsN's  
61 C-terminal AAGG sequence, which appears to be a target for proteolysis. We solved the former  
62 problem by expressing FtsN<sup>SPOR</sup> constructs in *E. coli* Shuffle T7, a strain engineered to  
63 promote disulfide bond formation in the cytosol (5). To reduce proteolysis, two aspartates were  
64 added to the C-terminus. Thus, the constructs reported here were cloned by amplifying the  
65 coding sequence for FtsN SPOR domains using P1123 as the 5' primer and P1402 as the

66 3'primer. The templates were the corresponding *TT* *gfp-ftsN<sup>SPOR</sup>* domain plasmids, either wild-  
67 type or mutant. The 274 bp product was digested with BamHI and HindIII, and then ligated into  
68 corresponding sites of pQE80L. All constructs carry the vector- and primer-derived sequence  
69 MRGSHHHHHHGSNNN at the N-terminus, codons 240-319 of *ftsN* and DD at the C-terminus.

70

71 **Determination of the distance between the sulfur atoms and alpha carbons of C252 and**

72 **C312.** To evaluate the possibility of disulfide bonding between C252 and C312, we have

73 measured the distance of sulfur atoms and alpha carbons of C252 and C312 for 45 lowest energy

74 NMR models of FtsN<sup>SPOR</sup> from PDB id 1UTA (6) using PyMOL.

75

76 **Modeling the structure of FtsN<sup>SPOR</sup> containing a disulfide bond.** The structure of FtsN<sup>SPOR</sup>

77 with a disulfide bond was modeled by choosing the cysteine rotamers in model 1 of 1UTA that

78 brought the two cysteines into disulfide bond forming conformations. The disulfide bond was

79 forced after removing the sulfur hydrogens and creating an SSBOND definition in the PDB

80 header. To remove conformational stress, the model was energy minimized with the NOVA

81 forcefield (7) in YASARA (13.6.16; <http://www.yasara.org>) by steepest descent minimization

82 and simulated annealing until convergence (less than 0.05 kJ/mol energy improvement per atom

83 during 200 steps) was reached. The starting model with reduced cysteines was also subjected to

84 the same energy minimization process. The overlay shown in Figure S6 compares the energy

85 minimized structures with and without a disulfide bond.

86

## Supplemental Results

87

88 **Overproduction of FtsN<sup>SPOR</sup> for purification purposes.** We constructed a plasmid that  
89 directed expression of FtsN<sup>SPOR</sup> with an N-terminal His<sub>6</sub>-tag under control of a T7 RNA  
90 polymerase-dependent promoter. The plasmid was transformed into BL21(DE3), but  
91 overproduction of His<sub>6</sub>-FtsN<sup>SPOR</sup> was barely detected by SDS-PAGE (Figure S2, compare lanes  
92 2 and 3). We tried to improve overproduction by changing the growth temperature, changing the  
93 amount of IPTG, letting the induction proceed for longer before harvest, and switching to a host  
94 with reduced RNase activity [BL21 Star<sup>TM</sup> (DE3) from Invitrogen]. None of these measures  
95 were of much help.

96         These difficulties were perplexing because neither Ursinus et al. nor Yang et al. had  
97 reported difficulty overproducing their FtsN<sup>SPOR</sup> constructs (6, 8). Looking more closely at what  
98 they had done, we realized their constructs contained a C-terminal His<sub>6</sub>-tag, whereas ours had an  
99 N-terminal His<sub>6</sub>-tag, so we were trying to overproduce the SPOR domain with its native C-  
100 terminus. The final 4 amino acids of FtsN are AAGG, which bears some resemblance to one of  
101 the recognition signals for the ClpXP protease system (9). We therefore added two aspartates to  
102 the C-terminus of our construct and discovered this greatly improved overproduction in BL21  
103 (DE3) (Figure S2, compare lanes 3 and 5). At this point we cloned our mutants of FtsN<sup>SPOR</sup> into  
104 the overproduction vector but included the two C-terminal aspartates. We also constructed a  
105 <sup>TT</sup>GFP-FtsN<sup>SPOR</sup> derivative with two aspartates to determine whether modifying the C-terminus  
106 affected septal localization. It did not (Figure 3A; Table S3). We later realized that FtsN<sup>SPOR</sup>  
107 has a disulfide bond, so we tested an overproduction host engineered to form proper disulfide  
108 bonds in the cytoplasm (*E. coli* SHuffle T7 from New England Biolabs). Switching from  
109 BL21(DE3) to SHuffle T7 greatly improved overproduction even for an FtsN<sup>SPOR</sup> construct with  
110 a native C-terminus (Figure S3, compare lanes 3 and 7), but adding C-terminal aspartates

111 increased protein production even further (Figure S3, compare lanes 7 and 9). Therefore, the  
112 FtsN<sup>SPOR</sup> proteins used in the PG binding assays were overproduced in SHuffle T7 and have a  
113 His<sub>6</sub>-tag at the N-terminus plus two aspartates at the C-terminus.

114 **Distance between the sulfur atoms and alpha carbons of C252 and C312.** To  
115 evaluate the possibility of disulfide bonding between C252 and C312, we have measured the  
116 distance of sulfur atoms and alpha carbons of C252 and C312 for 45 lowest energy structures of  
117 1UTA PDB structures using PyMOL. The distance for two sulfur atoms was  $5.3 \pm 0.9 \text{ \AA}$ , and the  
118 minimum distance was  $3.3 \text{ \AA}$  (Table S5). This indicates that the disulfide bond is not observed in  
119 the 1UTA PDB structure. On the other hand, the distance for two alpha carbon atoms of C252  
120 and C312 converged on  $3.6 \pm 0.3 \text{ \AA}$ , suggesting they are close enough for disulfide bond  
121 formation.

122

## 123 **References**

- 124
- 125 1. **Kwok S, Chang SY, Sninsky JJ, Wang A.** 1994. A guide to the design and use of  
126 mismatched and degenerate primers. *PCR Methods Appl* **3**:S39-47.
  - 127 2. **Chen JC, Beckwith J.** 2001. FtsQ, FtsL and FtsI require FtsK, but not FtsN, for co-  
128 localization with FtsZ during *Escherichia coli* cell division. *Mol Microbiol* **42**:395-413.
  - 129 3. **Tarry M, Arends SJ, Roversi P, Piette E, Sargent F, Berks BC, Weiss DS, Lea SM.**  
130 2009. The *Escherichia coli* cell division protein and model Tat substrate SufI (FtsP)  
131 localizes to the septal ring and has a multicopper oxidase-like structure. *J Mol Biol*  
132 **386**:504-519.
  - 133 4. **Arends SJ, Williams K, Scott RJ, Rolong S, Popham DL, Weiss DS.** 2010. Discovery  
134 and characterization of three new *Escherichia coli* septal ring proteins that contain a  
135 SPOR domain: DamX, DedD, and RlpA. *J Bacteriol* **192**:242-255.
  - 136 5. **Lobstein J, Emrich CA, Jeans C, Faulkner M, Riggs P, Berkmen M.** 2012. SHuffle, a  
137 novel *Escherichia coli* protein expression strain capable of correctly folding disulfide  
138 bonded proteins in its cytoplasm. *Microb Cell Fact* **11**:56.
  - 139 6. **Yang JC, Van Den Ent F, Neuhaus D, Brevier J, Löwe J.** 2004. Solution structure and  
140 domain architecture of the divisome protein FtsN. *Mol Microbiol* **52**:651-660.
  - 141 7. **Krieger E, Koraimann G, Vriend G.** 2002. Increasing the precision of comparative  
142 models with YASARA NOVA--a self-parameterizing force field. *Proteins* **47**:393-402.

- 143 8. **Ursinus A, van den Ent F, Brechtel S, de Pedro M, Höltje JV, Löwe J, Vollmer W.**  
144 2004. Murein (peptidoglycan) binding property of the essential cell division protein FtsN  
145 from *Escherichia coli*. *J Bacteriol* **186**:6728-6737.
- 146 9. **Flynn JM, Neher SB, Kim YI, Sauer RT, Baker TA.** 2003. Proteomic discovery of  
147 cellular substrates of the ClpXP protease reveals five classes of ClpX-recognition signals.  
148 *Mol Cell* **11**:671-683.
- 149 10. **Baba T, Ara T, Hasegawa M, Takai Y, Okumura Y, Baba M, Datsenko KA, Tomita**  
150 **M, Wanner BL, Mori H.** 2006. Construction of *Escherichia coli* K-12 in-frame, single-  
151 gene knockout mutants: the Keio collection. *Mol Syst Biol* **2**:2006 0008.
- 152 11. **Gerding MA, Liu B, Bendezu FO, Hale CA, Bernhardt TG, de Boer PA.** 2009. Self-  
153 enhanced accumulation of FtsN at Division Sites and Roles for Other Proteins with a  
154 SPOR domain (DamX, DedD, and RlpA) in *Escherichia coli* cell constriction. *J Bacteriol*  
155 **191**:7383-7401.
- 156 12. **Bardwell JC, McGovern K, Beckwith J.** 1991. Identification of a protein required for  
157 disulfide bond formation in vivo. *Cell* **67**:581-589.

158

159

160 **Table S1: Strains used in this study**

| Strain     | Genotype or relevant features                                                                                                                                                                                                 | Source or reference |
|------------|-------------------------------------------------------------------------------------------------------------------------------------------------------------------------------------------------------------------------------|---------------------|
| BW25113    | $\Delta(araD-araB)567, lacZ4787(\Delta)::rrnB-3, rph-1, \Delta(rhaD-rhaB)568, hsdR514$                                                                                                                                        | (10)                |
| CH34/pMG20 | MG1655 <i>lacIZYA</i> <> <i>frt ftsA</i> (E124A) <i>ftsN</i> <> <i>kan</i> . The plasmid is a pACYC derivative carrying $P_{BAD}::torAss-bfp-T7.tag-ftsN(71-105)$                                                             | (11)                |
| EC251      | Our isolate of MG1655 (wild-type)                                                                                                                                                                                             | Lab collection      |
| ER1821     | <i>glnV44 e14</i> ( <i>McrA</i> <sup>-</sup> ) <i>rfbD1 relA1 endA1 spoT1 thi-1</i> $\Delta(mcrC-mrr)114::IS10$                                                                                                               | New England Biolabs |
| JP120      | ER1821 <i>dsbA::kan1</i>                                                                                                                                                                                                      | (12)                |
| JW3832     | BW25113 $\Delta dsbA::kan$                                                                                                                                                                                                    | (10)                |
| JCB570     | MC4100 <i>phoR zig::Tn10</i>                                                                                                                                                                                                  | (12)                |
| JCB571     | JCB570 <i>dsbA::kan1</i>                                                                                                                                                                                                      | (12)                |
| JCB502     | Bardwell lab MG1655 isolate                                                                                                                                                                                                   | J. Bardwell         |
| JCB572     | JCB572 <i>dsbA::kan1</i>                                                                                                                                                                                                      | (12)                |
| Shuffle T7 | <i>fhuA2 lacZ::T7 gene1 [lon] ompT ahpC gal</i> $\lambda att::pNEB3-r1-cDsbC$ (SpecR, <i>lacIq</i> ) $\Delta trxB sulA11 R(mcr-73::miniTn10--TetS)2 [dcm] R(zgb-210::Tn10 --TetS) endA1 \Delta gor \Delta(mcrC-mrr)114::IS10$ | New England Biolabs |

161



162 **Table S2: Primers used in this study**

| <b>Primer</b> | <b>Codon<sup>b</sup></b> | <b>Sequence<sup>a</sup></b>         |
|---------------|--------------------------|-------------------------------------|
| P455          |                          | CACAGAATTCATTAAGAGGAG               |
| P760          |                          | CGGGATCCGGTGGTCTGTACTTCATTACG       |
| P761          |                          | CCCAAGCTTTCAACCCCGGCGGCGAGCCG       |
| P1123         |                          | GCCGGATCCAACAACAACGCGGAGAAAAAGACGAA |
| P1325         | R247                     | AAAGACGAACGCGMNTGGATGGTGCAG         |
| P1326         | M249                     | GAACGCCGCTGGGHGGTGCAGTGCGGT         |
| P1327         | Q251                     | CGCTGGATGGTGGMNTGCGGTTTCGTTC        |
| P1328         | S254                     | GTGCAGTGCGGTRMRTTCAGAGGCGCG         |
| P1329         | N281                     | ATCACCACCAACGMNGGCTGGAATCGT         |
| P1330         | W283                     | ACCAACAATGGCKMYAATCGTGTGGTC         |
| P1331         | R285                     | AATGGCTGGAATRMRTGGTTCATTGGC         |
| P1332         | V287                     | TGGAATCGTGTGADYATTGGCCCGGTG         |
| P1333         | P290                     | GTGGTCATTGGCGHGGTGAAAGGCAAA         |
| P1334         | R256                     | TGCGGTTTCGTTCHNGGCGCGAACAG          |
| P1335         | E259                     | TTCAGAGGCGCGGHYCAGGCAGAGACG         |
| P1336         | E262                     | GCGGAACAGGCAGHYACGGTACGTGCT         |
| P1337         | T263                     | GAACAGGCAGAGKCNGTACGTGCTCAG         |
| P1338         | R265                     | GCAGAGACGGTAGHNGCTCAGCTGGCG         |
| P1339         | Q267                     | ACGGTACGTGCTRMNCTGGCGTTCGAA         |
| P1340         | F270                     | GCTCAGCTGGCG KMYGAAGGCTTTGAC        |
| P1341         | D274                     | TTCGAAGGCTTT RMRTCGAAAATCACC        |
| P1342         | K276                     | GGCTTTGACTCG RMYATCACCACCAAC        |
| P1343         | T278                     | GACTCGAAAATCKCCACCAACAATGGC         |
| P1344         | N280                     | AAAATCACCACCGMNAATGGCTGGAAT         |
| P1345         | K292                     | ATTGGCCCGGTGRMYGGCAAAGAGAAC         |
| P1346         | K294                     | CCGGTGAAAGGCRMYGAGAACGCAGAC         |
| P1347         | E295                     | GTGAAAGGCAAAGHYAACGCAGACAGC         |
| P1348         | N298                     | AAAGAGAACGCARMRAGCACCTCAAT          |
| P1349         | S299                     | GAGAACGCAGACRCNACCCTCAATCGG         |

|       |                              |                                                                                                 |
|-------|------------------------------|-------------------------------------------------------------------------------------------------|
| P1350 | N302                         | GACAGCACCTCG <b>M</b> NCGGTTGAAGATG                                                             |
| P1351 | R303                         | AGCACCTCAAT <b>G</b> HNTTGAAGATGGCG                                                             |
| P1352 | K305                         | CTCAATCGGTT <b>G</b> RMYATGGCGGGTCAT                                                            |
| P1353 | M306                         | AATCGGTTGAAG <b>G</b> HGGCGGGTCATA                                                              |
| P1354 | T310                         | CCCA <b>A</b> AGCTTCAACCCCCGGCGGCGAGCCGAATGCAGTTN<br>DCATGACCCGCCAT                             |
| P1355 | N311                         | CCCA <b>A</b> AGCTTCAACCCCCGGCGGCGAGCCGAATGCANDCT<br>GTATGACCCGC                                |
| P1343 | N281                         | ATCACCACCAAC <b>G</b> MNGGCTGGAATCGT                                                            |
| P1356 | I313                         | CCCA <b>A</b> AGCTTCAACCCCCGGCGGCGAGCC <b>G</b> ND <b>C</b> GCAGTTT<br>GTATG                    |
| P1357 | L315                         | CCCA <b>A</b> AGCTTCAACCCCCGGCGG <b>C</b> NDCCCGAATGCAGTT                                       |
| P1402 | Adds DD<br>to C-<br>terminus | CGTA <b>A</b> AGCTTAATCGTCACCCCCGGCGGCGAGCCGAATGCA<br>G                                         |
| P1477 | R247                         | AAAGACGAACG <b>C</b> RCATGGATGGTGCAG                                                            |
| P1478 | R247K                        | AAAGACGAACGCA <b>A</b> AGTGGATGGTGCAG                                                           |
| P1479 | T263S                        | GAACAGGCAGAG <b>A</b> GCGTACGTGCTCAG                                                            |
| P1480 | T263D                        | GAACAGGCAGAG <b>G</b> ACGTACGTGCTCAG                                                            |
| P1497 | Q251                         | CGCTGGATGGT <b>G</b> RCATGCGGTTTCGTT                                                            |
| P1498 | Q251K                        | CGCTGGATGGT <b>G</b> AAGTGCAGTTTCGTT                                                            |
| P1581 | M249A                        | GAACGCCGCTGG <b>G</b> CGGTGCAGTGCAGT                                                            |
| P1582 | V287A                        | TGGAATCGTGT <b>G</b> GCGATTGGCCCGGTG                                                            |
| P1583 | R256A                        | TGCGGTTTCGTT <b>C</b> GCAGGCGCGGAACAG                                                           |
| P1584 | K294A                        | CCGGTGAAAGG <b>C</b> GCAGAGAACGCAGAC                                                            |
| P1790 | C252A                        | GCC <b>G</b> GATCCAACAACAACGCGGAGAAAAAAGACGAACGC<br>CGCTGGATGGTGCAG <b>G</b> CCGGTTCGTTTCAGAGGC |
| P1791 | C312A                        | CCCA <b>A</b> AGCTTTCAACCCCCGGCGGCGAGCCGAAT <b>G</b> GCGTTT<br>GTATGACCCGC                      |

---

<sup>a</sup>DNA sequence is given in the 5' to 3' direction for all primers; <sup>b</sup>Codon targeted for mutagenesis

Base pairs underlined are restriction enzyme sites and base pairs that are bolded are the mutagenized codon

**Table S3. Localization of <sup>TT</sup>GFP-FtsN<sup>SPOR</sup> in wild-type background.**

| <b>Amino Acid Substitution</b> | <b>n*</b> | <b>% cells with ring (s)</b> | <b>Amino Acid Substitution</b> | <b>n*</b> | <b>% cells with ring (s)</b> |
|--------------------------------|-----------|------------------------------|--------------------------------|-----------|------------------------------|
| WT                             | 30        | 70±9                         | W283D                          | 4         | 9±6                          |
| WT <sup>DD</sup>               | 2         | 73±14                        | W283A                          | 3         | 23±3                         |
| R247A                          | 2         | 69±5                         | R285K                          | 3         | 44±5                         |
| R247E                          | 2         | 78±7                         | R285A                          | 4         | 22±2                         |
| R247T                          | 2         | 70±1                         | R285E                          | 4         | 11±1                         |
| R247K                          | 2         | 75±1                         | V287I                          | 2         | 67±15                        |
| M249V                          | 3         | 58±15                        | V287S                          | 3         | 60±20                        |
| M249E                          | 2         | 44±4                         | V287A                          | 2         | 53±7                         |
| M249A                          | 2         | 58±1                         | P290V                          | 4         | 20±5                         |
| Q251E                          | 4         | 11±8                         | P290E                          | 2         | 40±1                         |
| Q251T                          | 3         | 9±2                          | P290A                          | 3         | 25±6                         |
| Q251A                          | 3         | 18±4                         | K292D                          | 2         | 57±11                        |
| Q251K                          | 2         | 17±6                         | K292A                          | 2         | 54±16                        |
| S254K                          | 3         | 5±8                          | K292N                          | 3         | 58±12                        |
| S254E                          | 3         | 13±8                         | K294N                          | 2         | 63±10                        |
| S254A                          | 2         | 82±6                         | K294D                          | 2         | 61±22                        |
| R256D                          | 2         | 24±9                         | K294T                          | 2         | 60±7                         |
| R256V                          | 2         | 31±1                         | K294A                          | 2         | 48±5                         |
| R256E                          | 2         | 46±13                        | E295V                          | 2         | 59±2                         |
| R256A                          | 2         | 28±3                         | E295A                          | 2         | 68±1                         |
| E259A                          | 2         | 49±9                         | E295D                          | 2         | 56±2                         |
| E259T                          | 2         | 71±16                        | D298E                          | 3         | 66±8                         |
| E262A                          | 4         | 51±15                        | D298K                          | 2         | 61±0                         |
| E262V                          | 2         | 33±7                         | D298A                          | 3         | 54±9                         |

| <b>Amino Acid Substitution</b> | <b>n*</b> | <b>% cells with ring (s)</b> | <b>Amino Acid Substitution</b> | <b>n*</b> | <b>% cells with ring (s)</b> |
|--------------------------------|-----------|------------------------------|--------------------------------|-----------|------------------------------|
| T263A                          | 2         | 68±8                         | S299A                          | 2         | 66±2                         |
| T263S                          | 2         | 82±4                         | S299T                          | 2         | 66±5                         |
| T263D                          | 4         | 29±8                         | N302E                          | 2         | 73±2                         |
| R265V                          | 3         | 48±5                         | N302D                          | 2         | 73±4                         |
| R265A                          | 2         | 62±16                        | N302A                          | 3         | 64±4                         |
| R265E                          | 2         | 26±2                         | R303V                          | 2         | 52±12                        |
| Q267A                          | 2         | 49±2                         | R303A                          | 2         | 57±9                         |
| Q267E                          | 2         | 54±8                         | K305D                          | 2         | 59±8                         |
| F270S                          | 3         | 54±17                        | K305A                          | 2         | 62±9                         |
| F270A                          | 2         | 59±1                         | M306A                          | 2         | 52±4                         |
| F270Y                          | 2         | 39±6                         | M306E                          | 2         | 73±1                         |
| F270D                          | 4         | 33±11                        | M306V                          | 2         | 59±8                         |
| D274A                          | 2         | 41±5                         | T310A                          | 2         | 65±4                         |
| D274E                          | 2         | 73±2                         | T310D                          | 2         | 63±4                         |
| D274T                          | 2         | 36±5                         | T310E                          | 3         | 66±15                        |
| K276A                          | 2         | 59±2                         | N311A                          | 3         | 59±13                        |
| K276D                          | 2         | 49±9                         | N311V                          | 3         | 57±18                        |
| T278S                          | 2         | 55±1                         | N311E                          | 2         | 57±6                         |
| T278A                          | 2         | 61±6                         | I313A                          | 5         | 25±9                         |
| N280A                          | 2         | 60±0                         | I313D                          | 4         | 2±1                          |
| N280E                          | 2         | 56±12                        | I313V                          | 3         | 56±9                         |
| N281E                          | 2         | 65±13                        | L315A                          | 4         | 37±5                         |
| N281A                          | 2         | 64±0                         | L315V                          | 2         | 52±10                        |

\*n = number of independent experiments. Approximately 200 cells scored for most experiments.

166 **Table S4. Localization of <sup>TT</sup>GFP-FtsN<sup>SPOR</sup> in a FtsN<sup>SPOR</sup> null background (CH34/pMG20).**

| <b>Amino Acid Substitution</b> | <b>n*</b> | <b>% cells with ring (s)</b> | <b>Amino Acid Substitution</b> | <b>n*</b> | <b>% cells with ring (s)</b> |
|--------------------------------|-----------|------------------------------|--------------------------------|-----------|------------------------------|
| WT                             | 7         | 60±5                         | T278A                          | 2         | 42±6                         |
| R247E                          | 2         | 62±12                        | N281E                          | 2         | 52±3                         |
| Q251E                          | 3         | 9±1                          | W283D                          | 2         | 4±1                          |
| E259A                          | 3         | 46±0                         | K294N                          | 2         | 25±4                         |
| T263S                          | 2         | 63±8                         | D298E                          | 2         | 50±7                         |
| T263D                          | 2         | 17±0                         | N302D                          | 2         | 64±5                         |
| F270A                          | 2         | 36±6                         | M306E                          | 3         | 68±6                         |
| D274E                          | 2         | 66±1                         |                                |           |                              |

\*n = number of independent experiments. Approximately 200 cells scored for most experiments.

167

168

169 **Table S5. Estimated distance between sulfur and  $\alpha$ -carbons of C252 and C312 in 45 lowest**  
 170 **energy structures of FtsN<sup>SPOR</sup>.**

| Structure # in PDB (1UTA) | S-S Distance (Å) | C $\alpha$ -C $\alpha$ Distance (Å) | Structure # in PDB (1UTA) | S-S Distance (Å) | C $\alpha$ -C $\alpha$ Distance (Å) |
|---------------------------|------------------|-------------------------------------|---------------------------|------------------|-------------------------------------|
| 1                         | 6.2              | 3.5                                 | 26                        | 6.3              | 4.0                                 |
| 2                         | 3.6              | 3.8                                 | 27                        | 5.7              | 3.7                                 |
| 3                         | 5.0              | 3.3                                 | 28                        | 6.3              | 3.6                                 |
| 4                         | 7.0              | 4.0                                 | 29                        | 4.5              | 3.5                                 |
| 5                         | 5.0              | 3.2                                 | 30                        | 5.0              | 3.2                                 |
| 6                         | 4.9              | 3.2                                 | 31                        | 4.9              | 3.3                                 |
| 7                         | 6.0              | 3.8                                 | 32                        | 6.4              | 3.5                                 |
| 8                         | 3.4              | 3.6                                 | 33                        | 5.0              | 3.7                                 |
| 9                         | 5.0              | 5.2                                 | 34                        | 3.5              | 3.7                                 |
| 10                        | 4.7              | 3.4                                 | 35                        | 6.3              | 3.2                                 |
| 11                        | 3.3              | 3.6                                 | 36                        | 6.5              | 4.0                                 |
| 12                        | 6.5              | 3.7                                 | 37                        | 6.0              | 3.8                                 |
| 13                        | 4.3              | 3.8                                 | 38                        | 6.2              | 3.2                                 |
| 14                        | 6.5              | 3.4                                 | 39                        | 4.8              | 3.2                                 |
| 15                        | 4.9              | 3.3                                 | 40                        | 5.8              | 3.8                                 |
| 16                        | 4.9              | 3.4                                 | 41                        | 6.5              | 3.5                                 |
| 17                        | 4.9              | 3.2                                 | 42                        | 5.0              | 3.6                                 |
| 18                        | 5.0              | 3.3                                 | 43                        | 5.6              | 3.4                                 |
| 19                        | 4.7              | 3.3                                 | 44                        | 4.9              | 3.4                                 |
| 20                        | 5.0              | 3.5                                 | 45                        | 5.6              | 3.8                                 |
| 21                        | 5.8              | 3.6                                 |                           |                  |                                     |
| 22                        | 5.7              | 3.8                                 |                           |                  |                                     |
| 23                        | 4.6              | 3.6                                 |                           |                  |                                     |
| 24                        | 4.8              | 3.3                                 |                           |                  |                                     |
| 25                        | 5.6              | 3.3                                 |                           |                  |                                     |
|                           |                  |                                     |                           | S-S Distance (Å) | C $\alpha$ -C $\alpha$ Distance (Å) |
|                           |                  |                                     | Average                   | 5.3              | 3.6                                 |
|                           |                  |                                     | Standard deviation        | 0.9              | 0.3                                 |
|                           |                  |                                     | Median                    | 5.0              | 3.5                                 |
|                           |                  |                                     | Minimum                   | 3.3              | 3.2                                 |
|                           |                  |                                     | Maximum                   | 7.0              | 5.2                                 |

172 **Table S6. SPOR domain sequences with two cysteines.** These domains were retrieved from  
 173 the Pfam seed alignment of 136 SPOR domain on June 14, 2013. Cysteines are in red.

174

| Identifier/residues   | Sequence of SPOR domain                                                                                                             |
|-----------------------|-------------------------------------------------------------------------------------------------------------------------------------|
| >Q5E2H5_VIBF1/123-196 | SEIPYIMQ <b>C</b> GAYKNRSQAERKMNI AFQGITSTVRHAEGSSWYKVVLPY<br>KFKRDAEKDRHKLQRAKIEP <b>CA</b> IW                                     |
| >FTSN_ECOLI/244-315   | DERRWMVQ <b>C</b> SFRGAEQAETVRAQLAFEGFDSKIT'TNNGWNRVVIGPVKG<br>KENADSTLNRLKMAGHTN <b>C</b> IRL                                      |
| >Q7MQG0_VIBVY/72-144  | KEDFFWIQ <b>C</b> GILNQPMPLADAKPLYKQITTDVWMKPENKTYR <b>CL</b> IGPYQS<br>FAQASKDLKQVKKLGDYREAFIR                                     |
| >Y896_HAEIN/133-203   | DSKKFGLQ <b>C</b> GAFKNRAQAENLQGRLOMTGLNAQIQ'TNGEWNRVVASFDT<br>RELAVQAQSRRAKTVTD <b>C</b> VVIG                                      |
| >Q68XU0_RICTY/134-215 | SHTSYKVQLGSVKSEAEAMEEGAKIKKKFPKILQNVVIT'TKKVKYDDGKF<br>YYLILAGEYSSLNQAQAV <b>C</b> KKLAHNQQS <b>CV</b> LK                           |
| >Q6N5W7_RHOPA/457-539 | TSGGYVQVSSQRNEADAKASYRSLQSKFPSVLGSQPPLIKRVDLGSKGT<br>YYRAMVGFSSAEQAQV <b>C</b> GNLKSAGGQ <b>CV</b> VQR                              |
| >Q6G315_BARHE/758-839 | NSENYVQLASQPTHALAKDSLKNMKS KFGFLIGTRPLNIQSAVIPGKGT<br>YYRVRVQAQNRNEAIN <b>L</b> CENIKNSGG <b>S</b> C <b>F</b> ITR                   |
| >Q57DM9_BRUAB/909-990 | GAGGYFIQIASQPSAELAQKSYANMAQKYASVIGHGSVDIKRADIOGKGT<br>YYRVRVQAGSKEDALAL <b>C</b> SRLKSAGG <b>S</b> C <b>F</b> V <b>T</b> Q          |
| >Q8YIE5_BRUME/5-87    | KPKPWGIQLAGNFRRSVAINQWNRLRKQFASVLAGHNPVISRIRTPIGRR<br>GIYAVRIGADSRKEADGI <b>C</b> SSLHAVGG <b>A</b> C <b>I</b> VSR                  |
| >Q6N538_RHOPA/285-368 | ADRPWGVQLAAGFNRRALAS YARAMSRLSTVIGERDPTLLSGVFRSRGT<br>RPFYQVRIGAETRGEADD <b>L</b> C <b>K</b> QIRRAQ <b>A</b> C <b>L</b> VLR         |
| >Q57D64_BRUAB/329-409 | GRSNWRIQLAATPSRAGASELQEKYAPVVSRI VPGAKGEISPSPKGRKVY<br>RVRFSGVRDSAAASKA <b>CA</b> QLKRQ <b>Q</b> I <b>A</b> C <b>L</b> AIQ          |
| >Q7CXC2_AGRT5/348-428 | ERSRWEVQIAATDSEAAARSLLANARSNIGSYTGIAPYTEAVQSGSATLY<br>RARFTGFEDQSSAVS <b>A</b> C <b>K</b> ELKAQ <b>S</b> Y <b>A</b> C <b>V</b> VMT  |
| >Q57CW7_BRUAB/388-469 | AASGWAIQIGSLPSEGQARDMLAKASATAGRTLRSASPYTETFNKGSATF<br>YRARFVGF <b>T</b> SKQAAWD <b>A</b> C <b>A</b> SLKRNN <b>F</b> G <b>C</b> YAVA |
| >Q6N533_RHOPA/503-584 | AHSGWIIQVGALESEPEARKRLEAAREQASGLLGKADPFTEVTTTKGDRK<br>LYRARFAGLERDEAEAV <b>CR</b> KLKRS <b>D</b> IS <b>C</b> FTIK                   |
| >Q5FT21_GLUOX/335-415 | SYGPWAVQVGAFGSIGQAKFAATMARQAAFTSLQSARIEVHPTPSHGTTV<br>WRARLTGISRVGAAQ <b>A</b> C <b>S</b> TLSGQ <b>G</b> M <b>A</b> C <b>M</b> AVP  |
| >Q5FR24_GLUOX/369-448 | ATGNWAIQVGA FANAKQAS IATSAHSGGVVVASARSQVESVKGGRSHL<br>YRARLTGLTHENAVAA <b>CR</b> RRLSHG <b>S</b> P <b>C</b> VVVV                    |
| >Q9A6S6_CAUCR/186-266 | STGPASVQIGALSSPALADKAWAEAVRLAPGLAAGKGGKVETVDKNGTTL<br>YRTSVTGFATREAAK <b>A</b> F <b>C</b> E <b>A</b> IAASG <b>K</b> S <b>C</b> FVK  |
| >Q5FQ53_GLUOX/291-370 | SGGTHEVQLGALDSEAAARKEWDSL RHQAPALFAGHTPLFEKTTRGDHTF<br>VRLRIGGFADLKSARAY <b>CV</b> KLHAQ <b>S</b> V <b>A</b> C <b>T</b> P           |
| >Q5NP92_ZYMMO/297-374 | PAGAGVIQLGAFGSEAKANEVWSHLTQRYSWIKPLPHQIISVKIGKTFY<br>RLRATAGSQANS <b>F</b> C <b>S</b> QLQAAG <b>E</b> T <b>CA</b> HIG               |
| >Q5LQI7_SILPO/325-406 | PVGTRLAQLGAYDSPEIARA EWDRLNGRFGEYLDGKQRVIEASSGGRTF<br>YRLRAAGFGDLAEAR <b>H</b> F <b>C</b> SVLVAER <b>A</b> D <b>C</b> I <b>P</b> VT |
| >Q9A6D3_CAUCR/358-434 | PKGEWGVQVGAFRSKSLANEQLKLVGRITKLVSDAEGAVEGAGGMFRAQ<br>FQGMTNEAAARE <b>A</b> C <b>S</b> ALKAKR <b>M</b> P <b>C</b> I <b>V</b> LK      |
| >Q6N6F9_RHOPA/319-400 | PRTDFGVDLGAANTVEGLRGLWRKLSKTQKALKGLQPIIMIKENGNATQL<br>RLIAGPIADAAAAAK <b>V</b> CAALGSAD <b>R</b> A <b>C</b> EASVY                   |

175

176 **Figure S1. Western blot using anti-GFP antibody to document expression levels of select**  
177 **<sup>TT</sup>GFP-FtsN<sup>SPOR</sup> mutant proteins.** The R285 proteins are also shown in Figure 3A, but the  
178 blot below used independent cultures. Substitutions at P290 greatly impaired localization, but as  
179 shown by this blot, the proteins were unstable, so we did not classify P290 as a residue important  
180 for septal localization. The R285A and T263D substitutions impaired localization, but not  
181 sufficiently to make our cut-off for classifying R285 and T263 as important for localization. The  
182 blot below shows the corresponding mutant <sup>TT</sup>GFP-FtsN<sup>SPOR</sup> constructs are produced at normal  
183 levels.

184

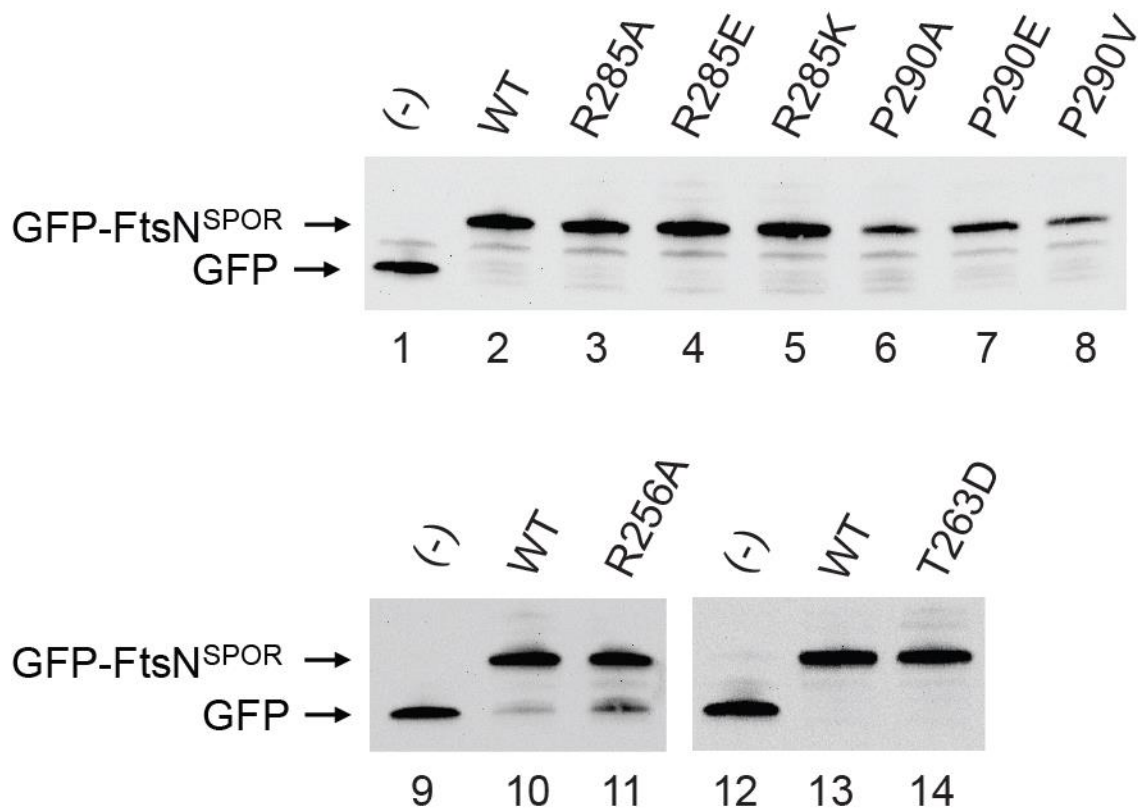

185

186



187 **Figure S2. Overproduction of His<sub>6</sub>-FtsN<sup>SPOR</sup> proteins.** Cells grown in LB at 37 °C to OD<sub>600</sub>  
 188 ~0.5 were induced overnight at 20 °C with 1 mM IPTG and then samples were harvested for  
 189 SDS-PAGE (Mini Protean TGX precast gels: Any kD; from BioRad, Hercules, CA). The  
 190 plasmids used were pDSW 1333 (Lane 2, 3, 6, and 7) or pDSW1314 (Lane 4, 5, 8, and 9).

191

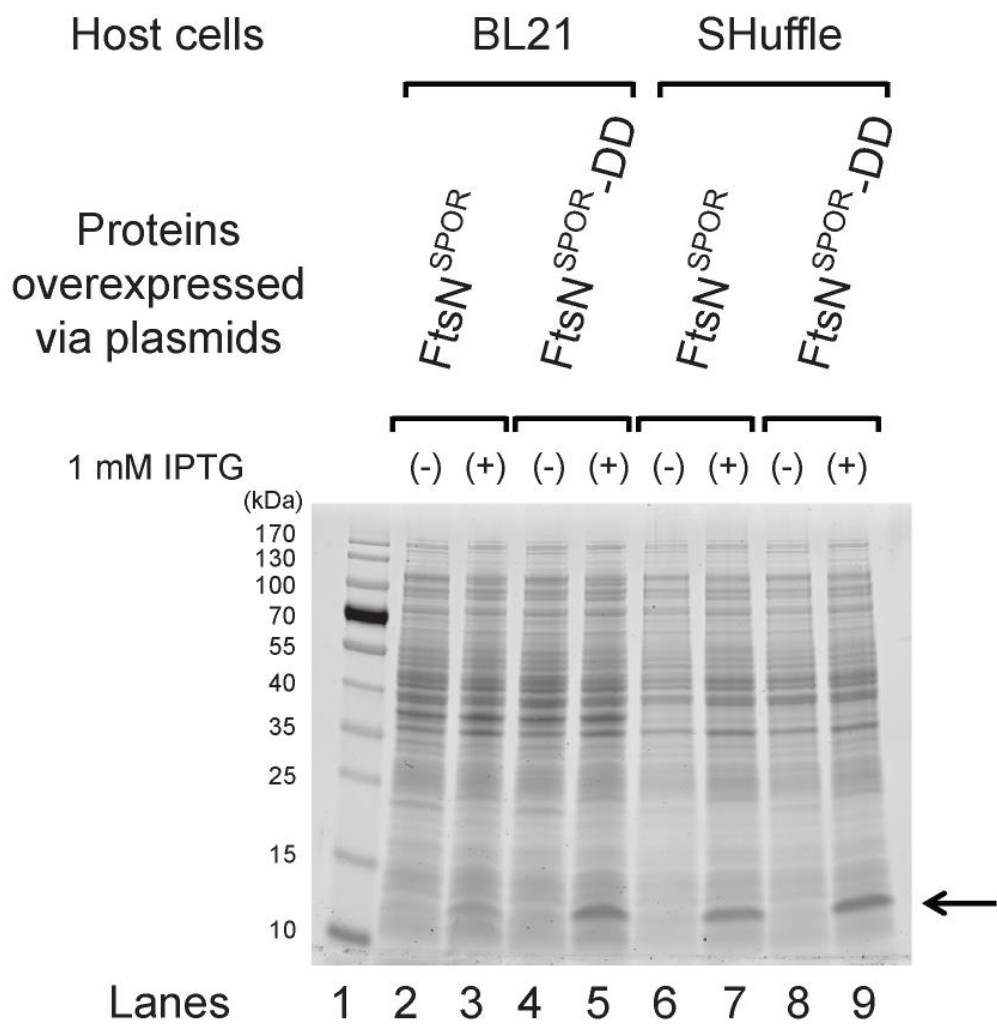

192

193 **Figure S3. FtsN contains a disulfide bond.** Whole cell extracts in Laemmli sample buffer  
194 containing (lanes 2, 4) or lacking (lanes 3, 5) 5%  $\beta$ -mercaptoethanol and analyzed by Western  
195 blot with anti-FtsN (top panel) or anti-FtsQ (bottom panel). Samples were loaded twice to  
196 facilitate visualization of any mobility differences. For the experiment shown here, samples  
197 were loaded on an Any kD<sup>TM</sup> Mini-PROTEAN<sup>®</sup> TGX<sup>TM</sup> gel (Bio-Rad) and run for 100 min. at  
198 120 V, whereas the experiment shown in Figure 4B used a 10% polyacrylamide gel that was run  
199 for 60 min. at 120V.

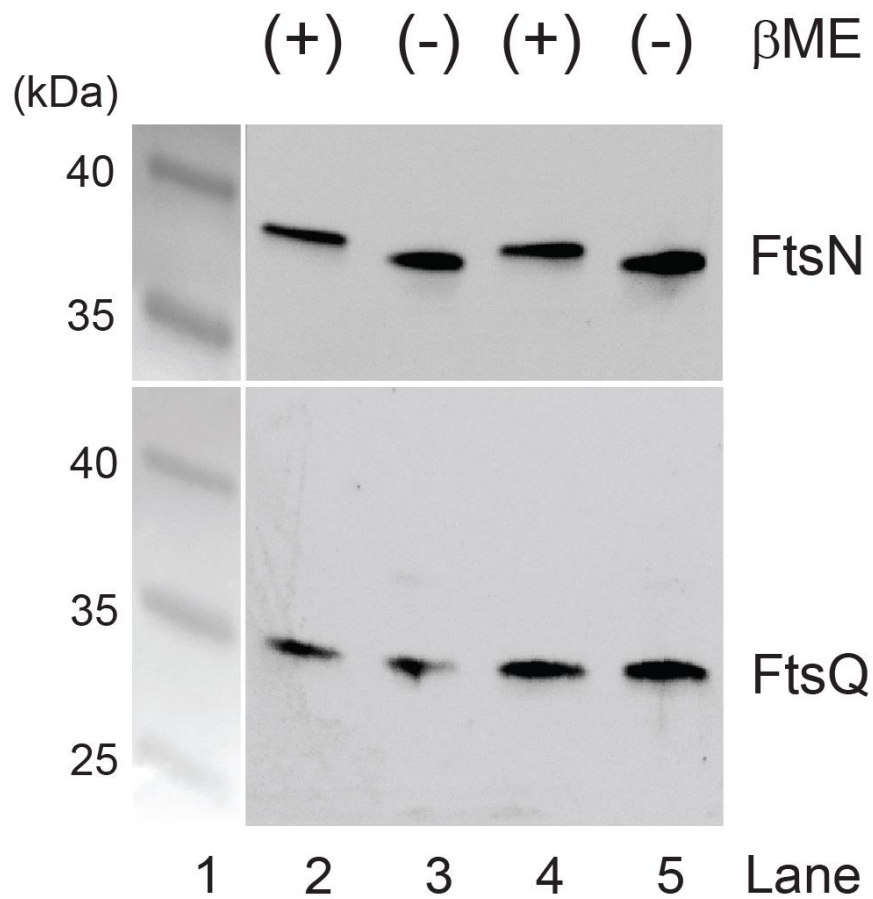

200

201 **Figure S4. Reduced abundance of FtsN in *dsbA* mutants grown in LB.** The indicated  
202 strains were grown at 30°C in LB to OD<sub>600</sub> ~0.5, then whole cell extracts were analyzed by  
203 Western blotting using anti-FtsN or anti-DamX as the primary antibody.

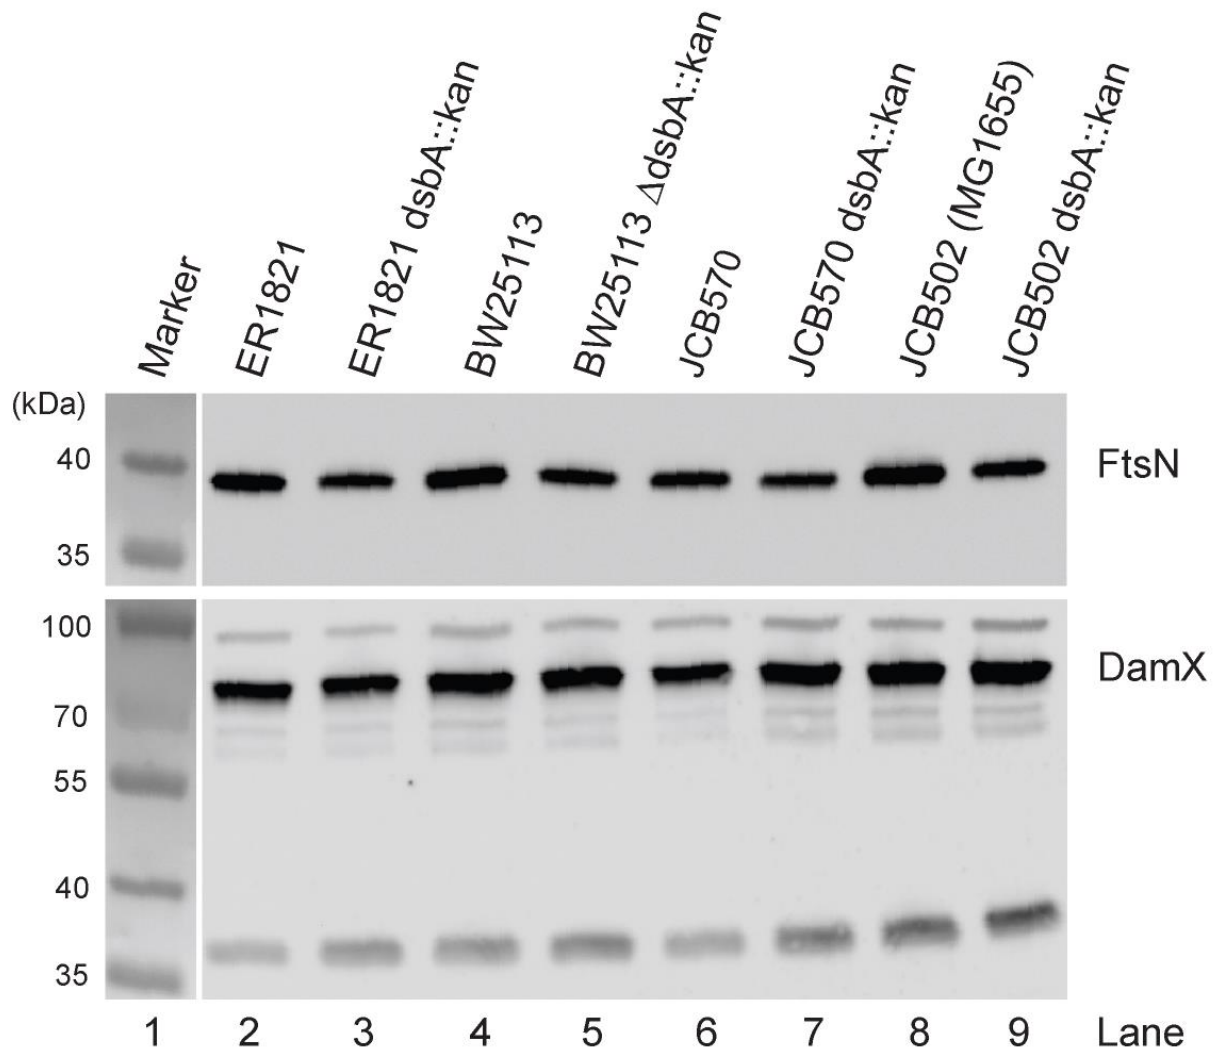

204

205 **Figure S5. Efficient localization of <sup>TT</sup>GFP-DamX<sup>SPOR</sup> does not require DsbA.** The indicated  
206 strains were grown to midlog phase, then immobilized on an agarose pad and photographed  
207 under fluorescence microscopy.

BW25113/pDSW997

BW25113  $\Delta dsbA::kan$ /pDSW997

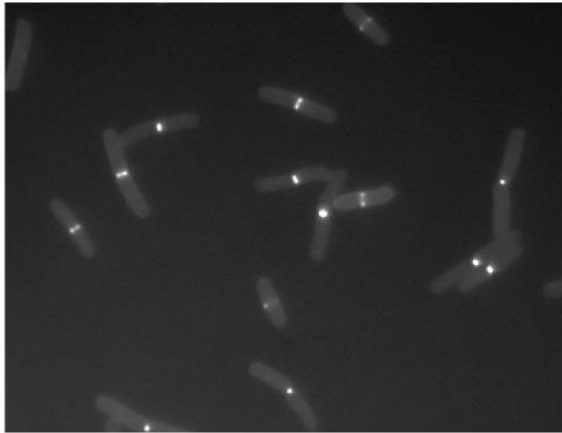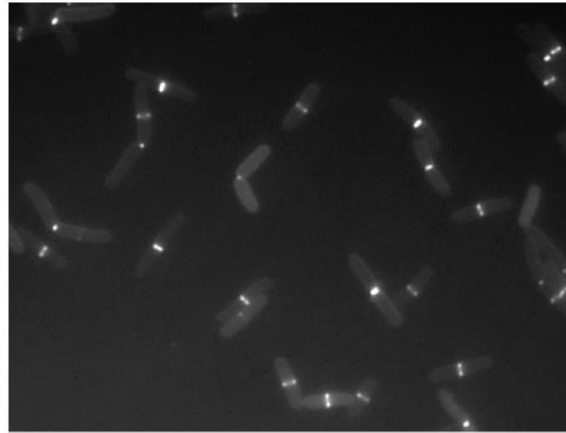

208

209

210 **Figure S6. Modeling the effect of the disulfide bond on the structure of FtsN<sup>SPOR</sup> reveals**  
211 **only minor changes.** A. Overlays of modeled structures for the reduced (red) and disulfide-  
212 bonded forms of FtsN<sup>SPOR</sup> viewed from the side (left) or the bottom (right). The disulfide bond  
213 is shown in orange. For clarity, only the backbone is shown. B. Comparison of disulfide-  
214 bonded FtsN<sup>SPOR</sup> to DamX<sup>SPOR</sup> and CwIC<sup>SPOR</sup>. Note that the  $\beta$ -sheet in the modeled FtsN<sup>SPOR</sup> is  
215 slightly more curved than it was in Figure 1 of the main text, but the sheet is still flat in  
216 comparison to the other SPOR domains. In the modeled FtsN<sup>SPOR</sup> structure, two cysteine  
217 residues (including the disulfide bond) are in orange. Other features are colored as in Figure 1.

A.

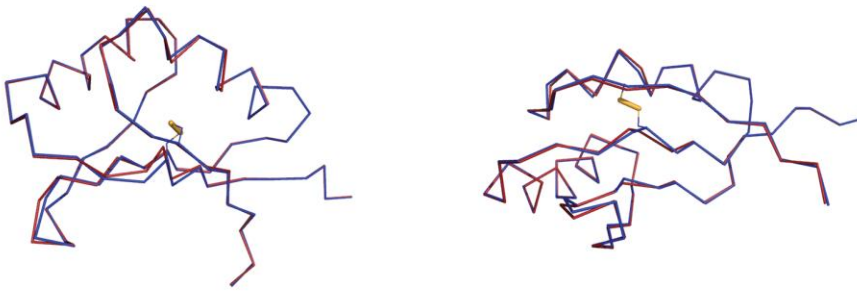

B.

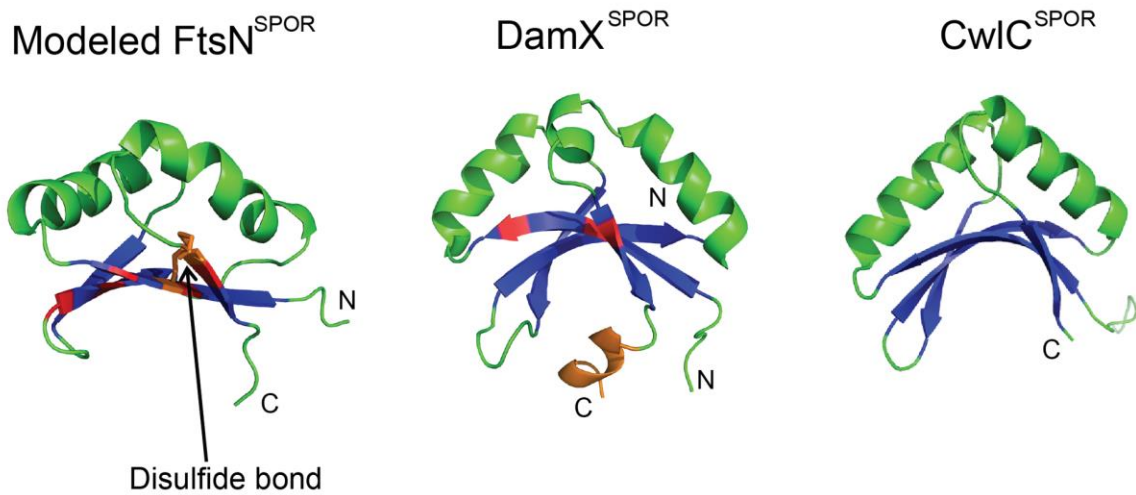

218
